# Supplementary material for: Aquaporin-1 and Aquaporin-4 Expression in Ependyma, Choroid Plexus and Surrounding Transition Zones in the Human Brain
Source: MDPI journal article supplement (doi:10.3390/biom13020212), 2023-01-22
Supplement: s1 [file s1]

| age      | sex    | post mortem interval | cause of death*         |
|----------|--------|----------------------|-------------------------|
| 83 years | female | 15 h                 | pulmonary carcinoma     |
| 89 years | male   | 12 h                 | kidney failure          |
| 91 years | female | 19 h                 | exsiccosis, GI bleeding |
| 75 years | female | 8 h                  | ischemic stroke         |
| 74 years | female | 9 h                  | multi organ failure     |
| 80 years | female | 10 h                 | cardiac failure         |
| 92 years | male   | 7                    | acute abdomen           |

**SM Table 1:** Age, sex and postmortem interval of body donors used in this study.

\* cause of death as stated in the official death certificate after external examination.
